# Supplementary material for: Exploration of tissue-specific gene expression patterns underlying timing of breeding in contrasting temperature environments in a song bird
Source: PubMed Central journal article supplement (PMC6720064; doi:10.1186/s12864-019-6043-0), 2019-09-02
Supplement: 12864_2019_6043_MOESM20_ESM.pdf [file 12864_2019_6043_MOESM20_ESM.pdf]

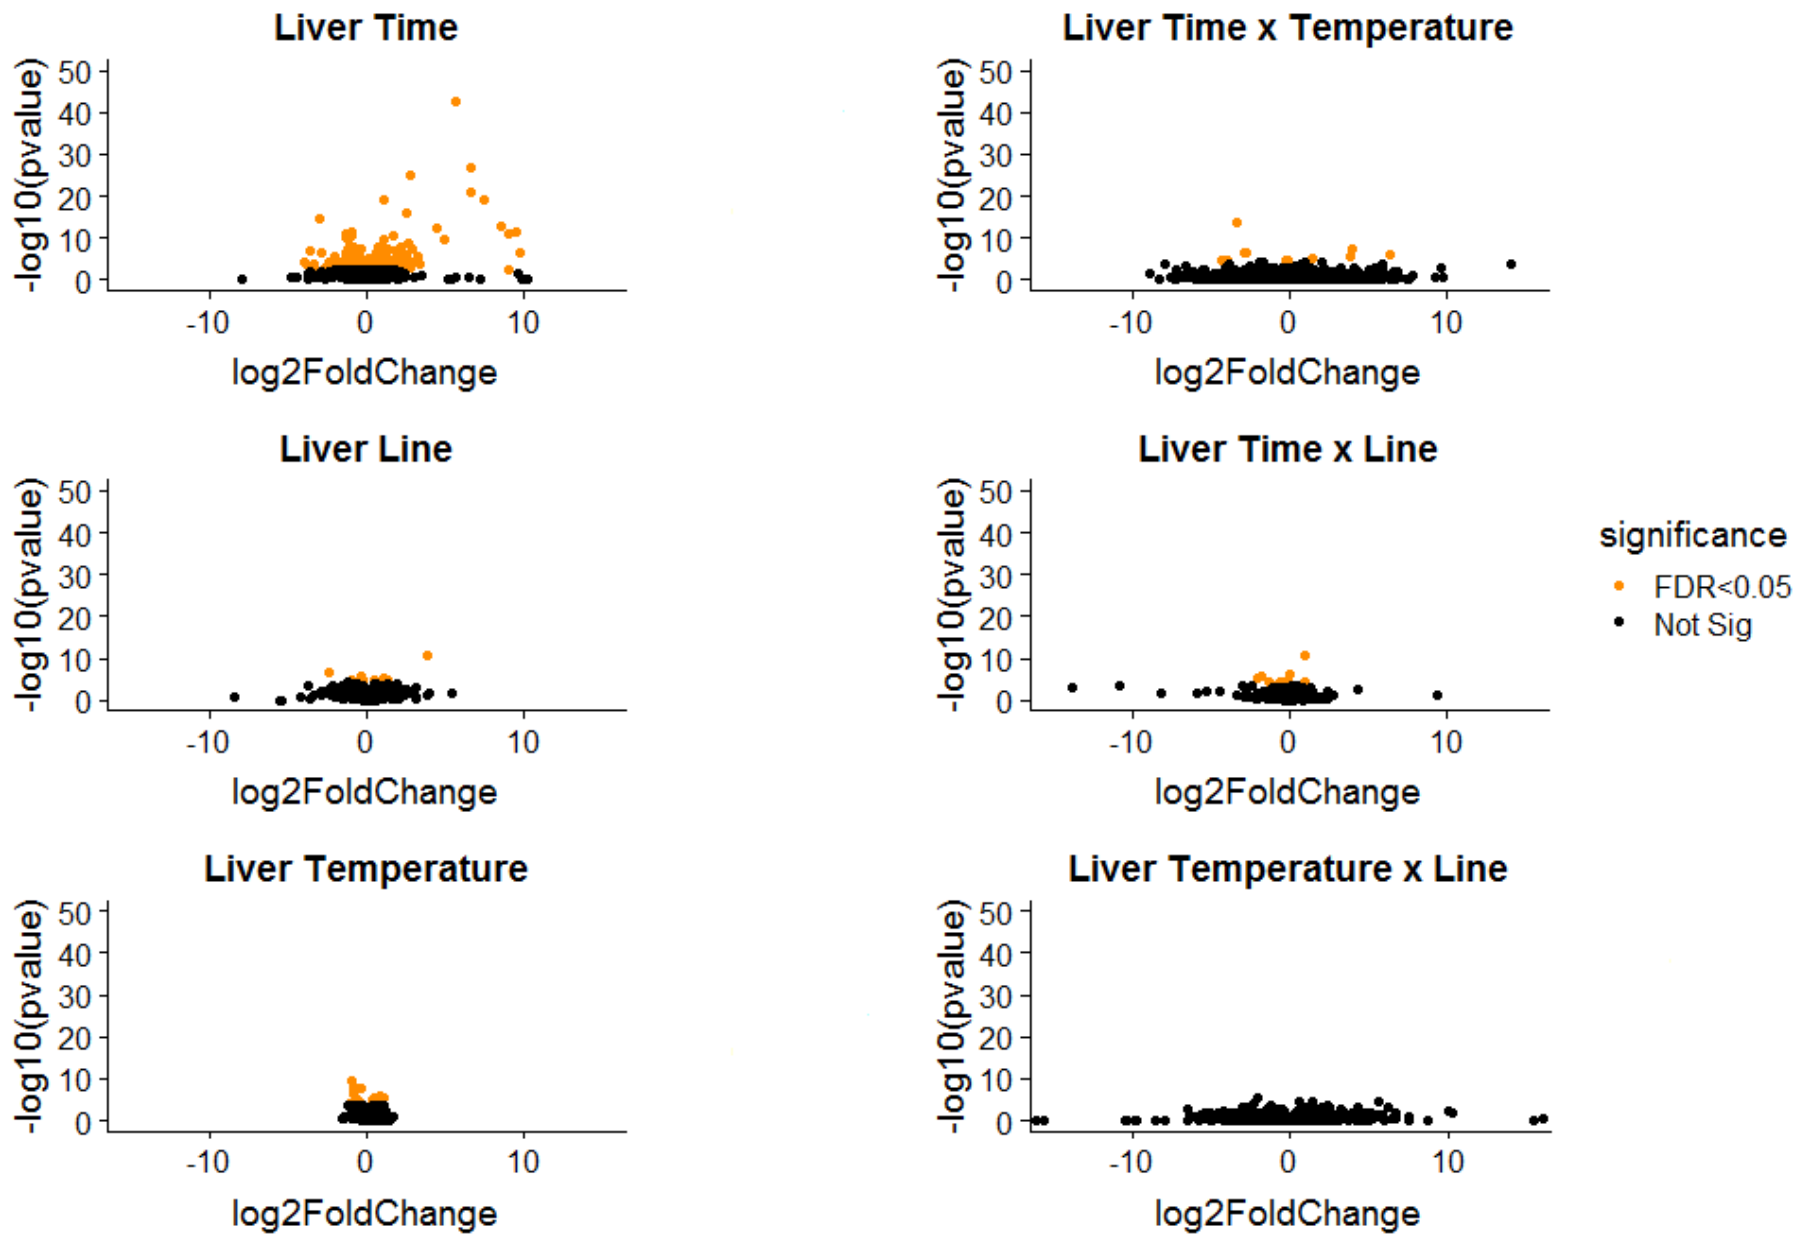

Fig S3. Volcano plots of all the transcripts analysed in liver RNA-seq in six different models. Genes differentially expressed with  $p < 0.05$  after correcting for false discovery rate are in orange. Genes with a  $p > 0.05$  after correcting for false discovery rate are in black.
