# Supplementary material for: Exploration of tissue-specific gene expression patterns underlying timing of breeding in contrasting temperature environments in a song bird
Source: PubMed Central journal article supplement (PMC6720064; doi:10.1186/s12864-019-6043-0), 2019-09-02
Supplement: 12864_2019_6043_MOESM25_ESM.pdf [file 12864_2019_6043_MOESM25_ESM.pdf]

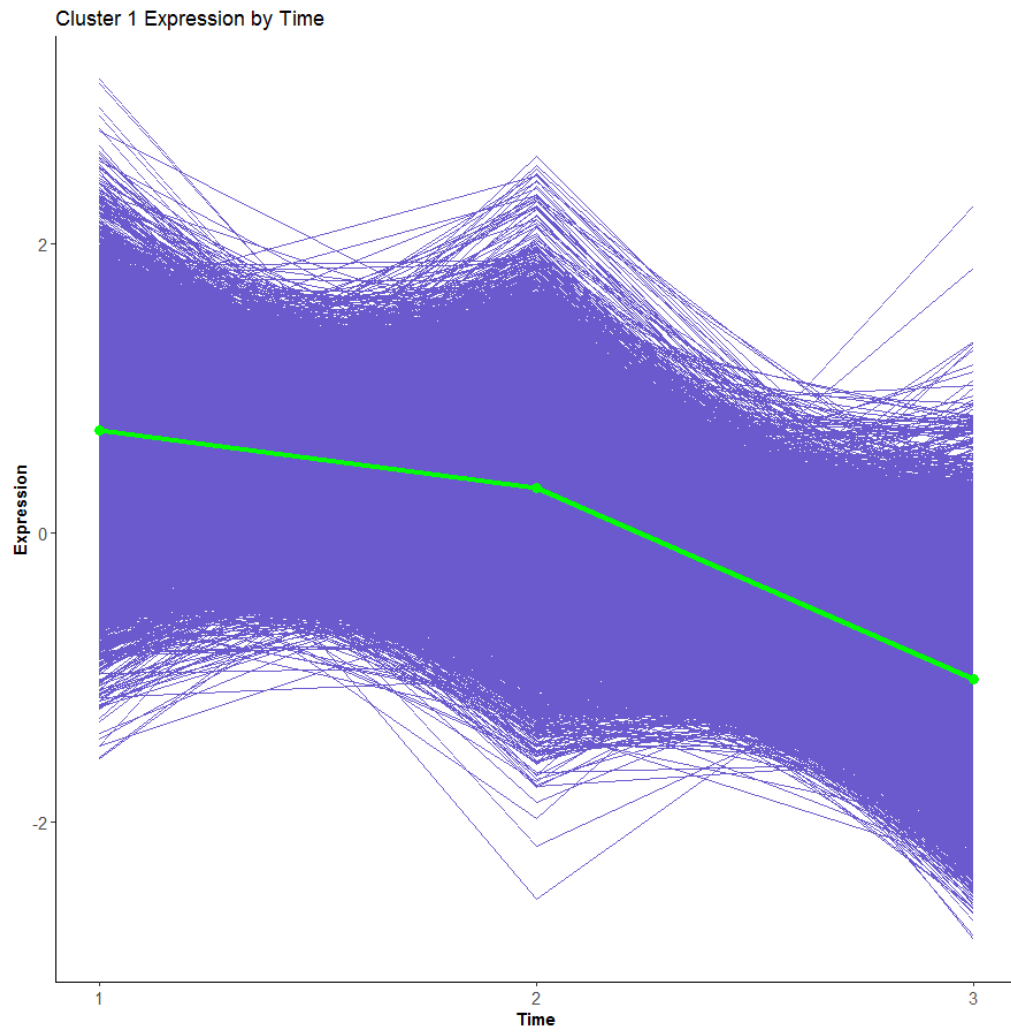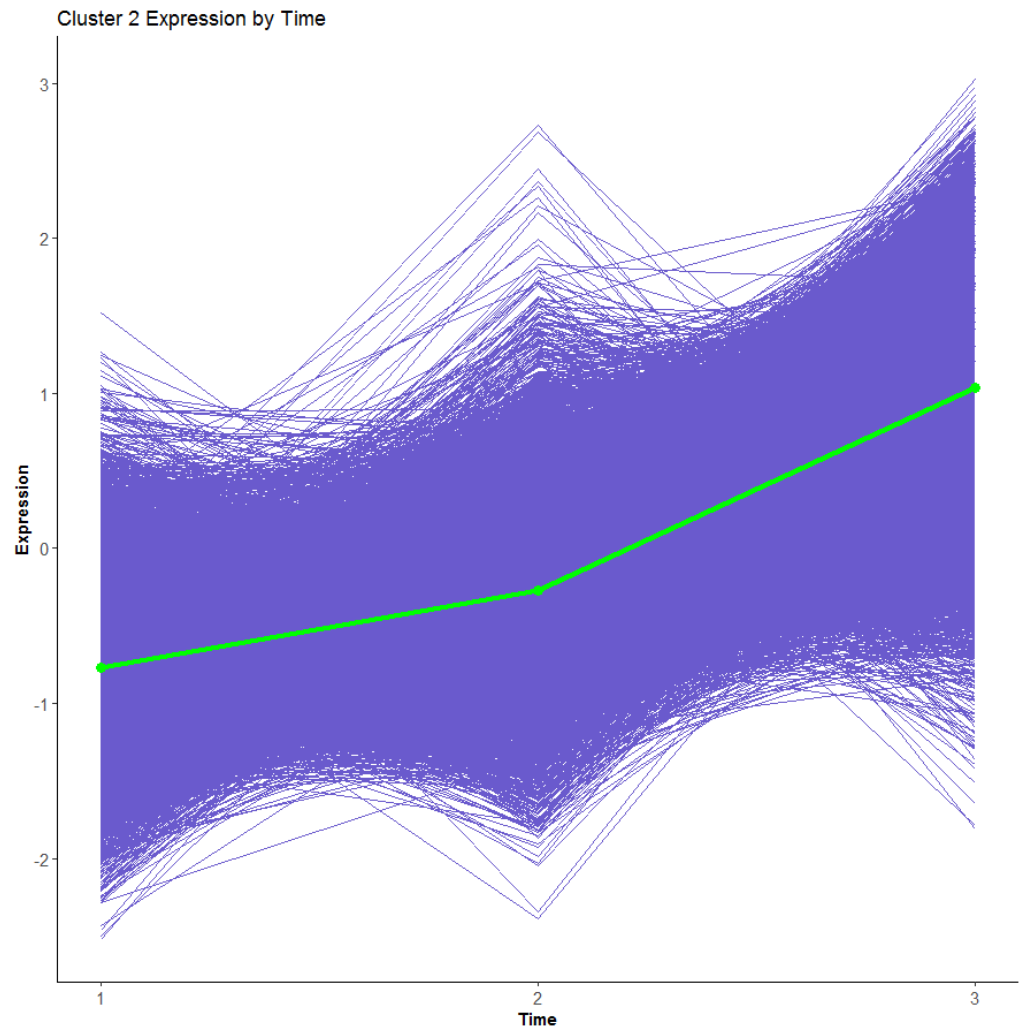

Fig S8. Expression patterns of DEG clusters in ovary time point main effect model.
