# Supplementary material for: Exploration of tissue-specific gene expression patterns underlying timing of breeding in contrasting temperature environments in a song bird
Source: PubMed Central journal article supplement (PMC6720064; doi:10.1186/s12864-019-6043-0), 2019-09-02
Supplement: 12864_2019_6043_MOESM28_ESM.pdf [file 12864_2019_6043_MOESM28_ESM.pdf]

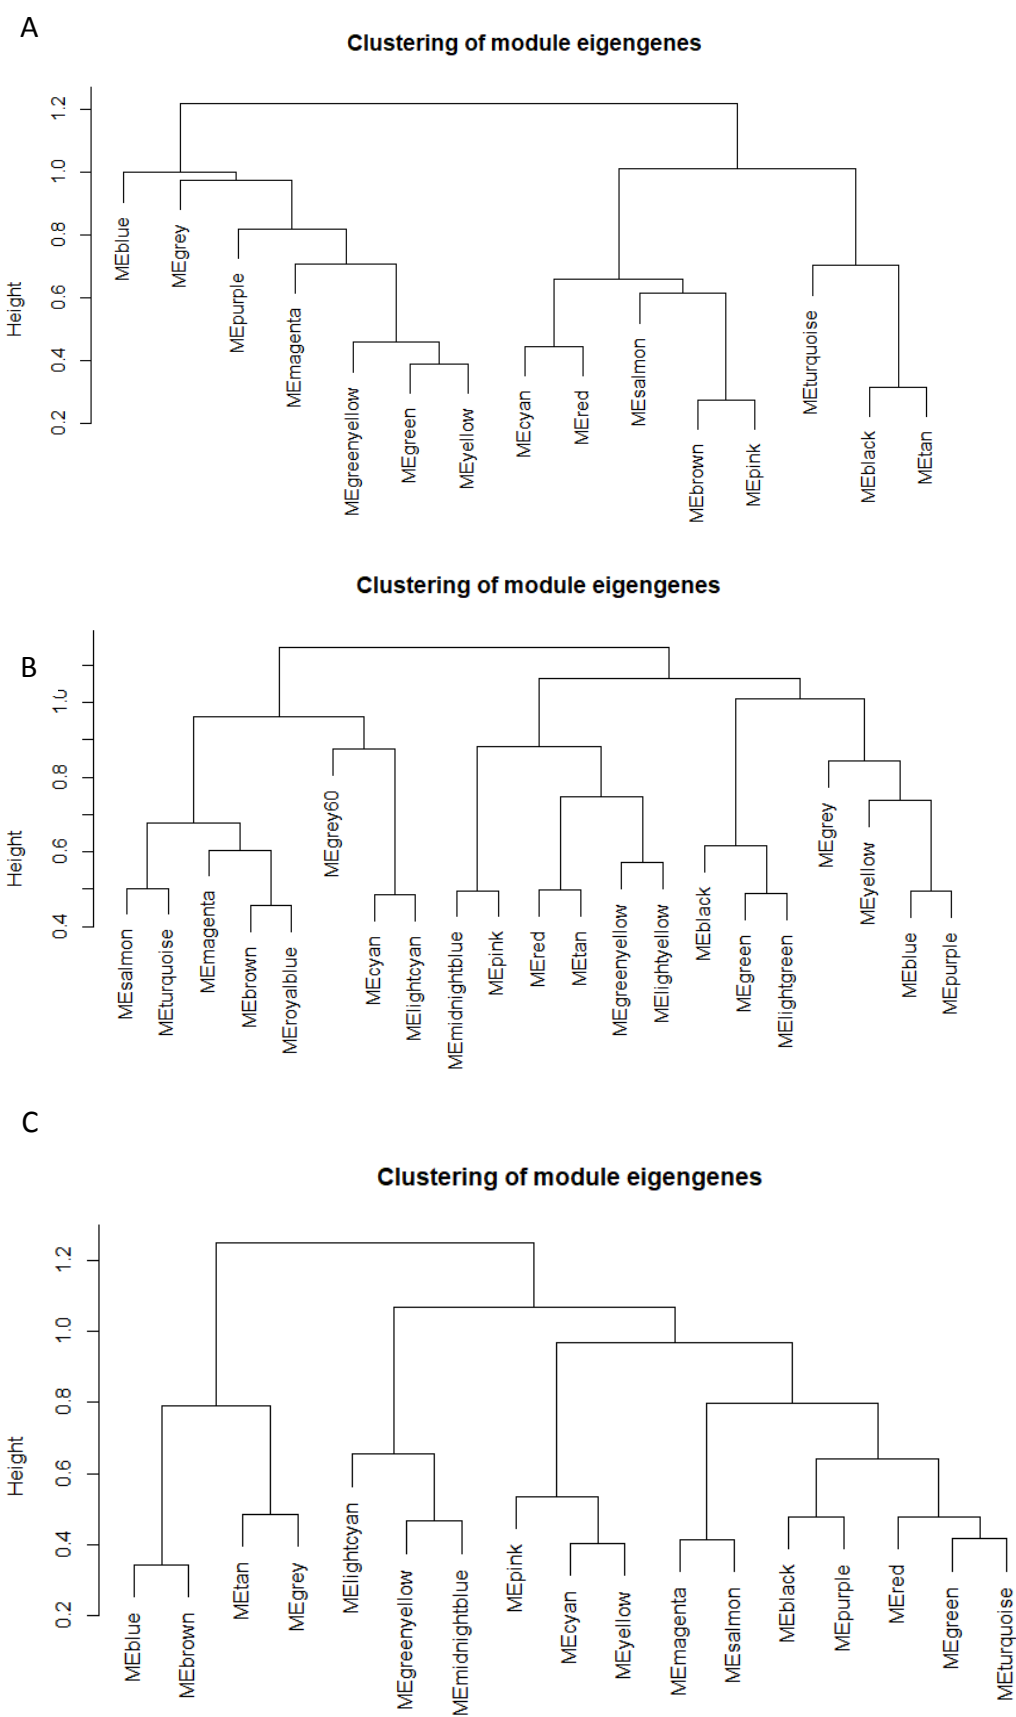

Fig S11. Hierarchical clustering tree based on WGCNA module eigengenes in A. hypothalamus, B. liver and C. ovary
