# Supplementary material for: Exploration of tissue-specific gene expression patterns underlying timing of breeding in contrasting temperature environments in a song bird
Source: PubMed Central journal article supplement (PMC6720064; doi:10.1186/s12864-019-6043-0), 2019-09-02
Supplement: 12864_2019_6043_MOESM29_ESM.pdf [file 12864_2019_6043_MOESM29_ESM.pdf]

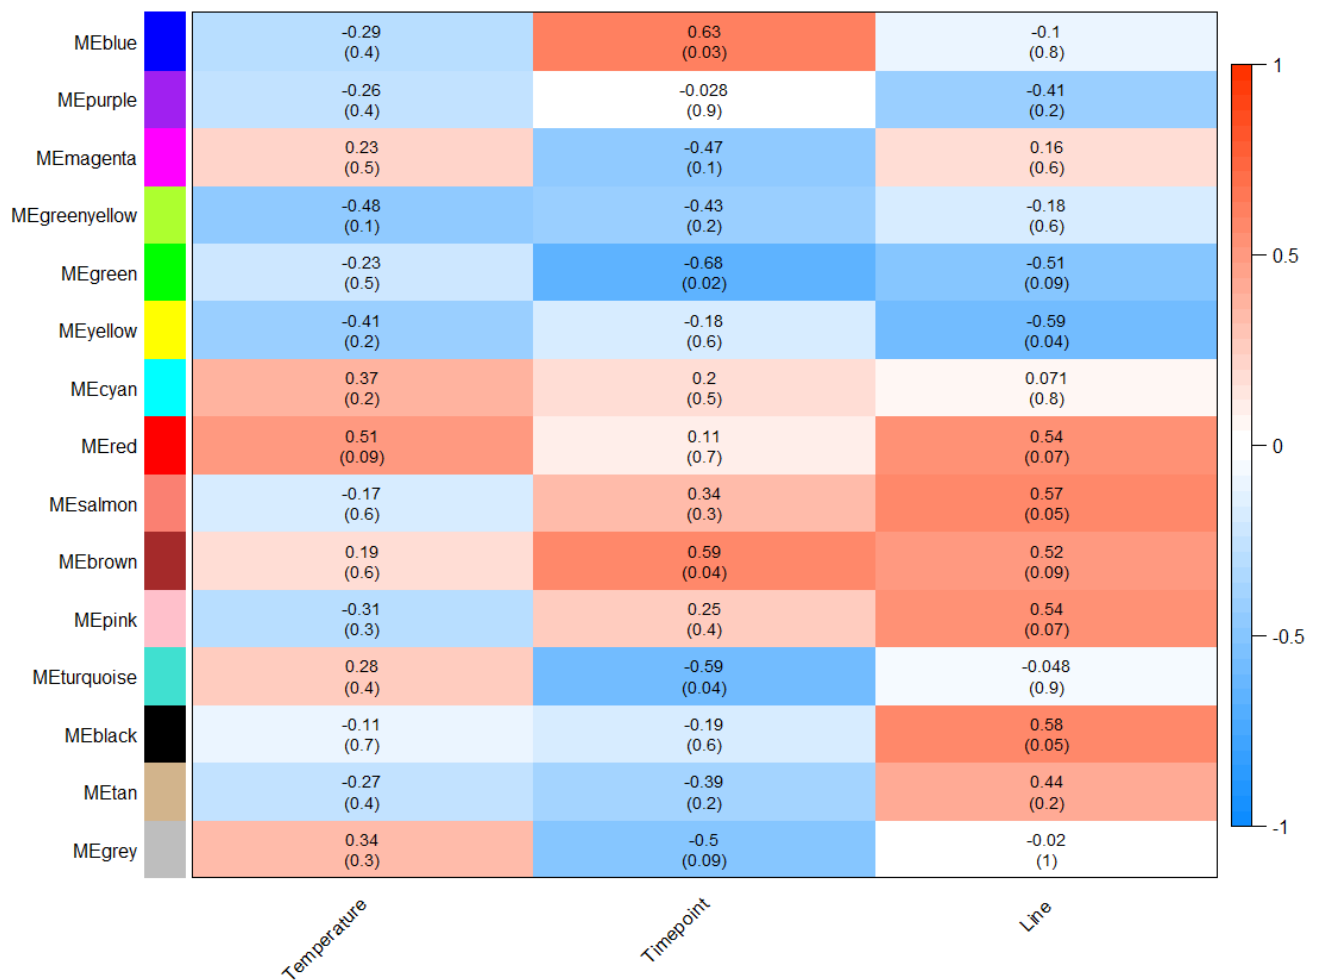

Fig S12. Matrix with the module-treatment relationships and corresponding p-values between the detected modules on the y-axis and treatments on the x-axis based on hypothalamus RNA-seq. The relationships are coloured based on their correlation: red is a strong positive correlation, while blue is a strong negative correlation. The value at the top of each square represents the correlation coefficient between the module eigengene and the treatment with the correlation p-value in parentheses.
